# Supplementary material for: Circulating Osteopontin and Prediction of Hepatocellular Carcinoma Development in a Large European Population
Source: Oxford University Press journal article supplement (doi:10.1158/1940-6207.capr-15-0434), 2016-06-23
Supplement: 19406207capr150434-sup-159468_2_supp_3540795_y8rryr.docx [file 19406207capr150434-sup-159468_2_supp_3540795_y8rryr.docx]

**Supplementary Figure Legends**

**Fig. S1. Plasma levels of OPN (ng/ml) in HCC Cases and matched Controls.**

**Fig. S2.** **Cubic spline for the association between OPN levels and HCC.** Multivariable adjusted odds ratio (continuous line) and 95% CI (dotted line) are shown for the continuous levels of OPN values associated to HCC. Reference value was set at 47.15 ng/ml (the optimal cut-off point) for all subjects. For better visibility, the levels were truncated at 1 and 99 percentile of distribution.
